# Supplementary material for: Cerebrospinal fluid neurogranin in Alzheimer’s disease studies: are immunoassay results interchangeable?
Source: publisher site journal article supplement (doi:10.1515/cclm-2021-0505), 2021-09-15
Supplement: Supplementary file 1 [file j_cclm-2021-0505_suppl.docx]

**
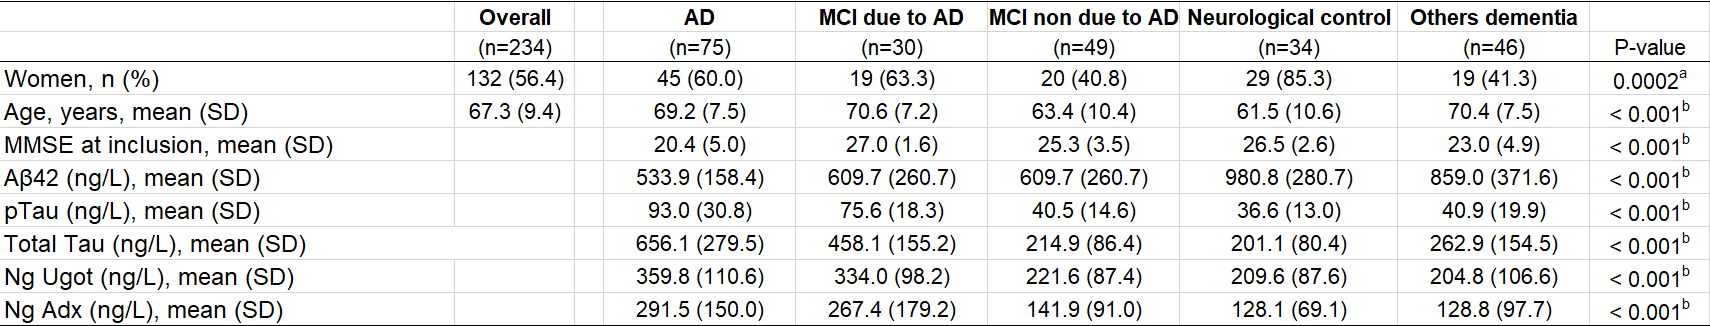
 Supplementary Table 1: Patient sample characteristics.**

Data are represented as n (%) or mean (SD). ap-Value for comparison of multiples qualitative data have been calculated using a Chi-2 square test. bp-Values for comparison of multiples quantitative data have been calculated using an analysis of variance ANOVA.
